# Supplementary material for: A Structural Model of the Pore-Forming Region of the Skeletal Muscle Ryanodine Receptor (RyR1)
Source: PLOS journal article supplement (doi:10.1371/journal.pcbi.1000367), 2009-04-23
Supplement: S4 (10.1371/journal.pcbi.1000367.s004) [file journal.pcbi.1000367.s004]

| Simulation                                  | Number of ions <sup>1</sup> |                | Total number of ions in<br>the selectivity filter | R <sup>‡</sup> |
|---------------------------------------------|-----------------------------|----------------|---------------------------------------------------|----------------|
|                                             | Ca <sup>2+</sup>            | K <sup>+</sup> |                                                   |                |
| RyR1-WT CaCl <sub>2</sub> /KCl <sup>2</sup> | 3.4                         | 1.7            | 5.1                                               | 6.9            |
| RyR1-WT CaCl <sub>2</sub> /KCl <sup>3</sup> | 2.94 ± 0.45                 | 1.13 ± 0.58    | 4.07 ± 0.95                                       | 11.31 ± 5.63   |

<sup>1</sup>In the selectivity filter, which is the shaded region shown in Figure 3 and 5. <sup>‡</sup>Ratio of preferential occupancy of ion1 over ion2 normalized by total number of ions present in each species. <sup>2</sup>Simulation with no vacuum above and below the simulation system. <sup>3</sup>Simulations with 2 nm vacuum above and below the simulation system.
